# Supplementary material for: Significance of surface charge and shell material of superparamagnetic iron oxide nanoparticle (SPION) based core/shell nanoparticles on the composition of the protein corona
Source: Royal Society of Chemistry journal article supplement (doi:10.1039/c4bm00264d), 2014-09-25
Supplement: c4bm00264d1.pdf [file c4bm00264d1.pdf]

ARTICLE

# Significance of surface charge and shell material of Superparamagnetic Iron Oxide Nanoparticles (SPIONs) based core/shell nanoparticles on the composition of the protein corona

Cite this: DOI: 10.1039/x0xx00000x

Received 00th January 2012,  
Accepted 00th January 2012

DOI: 10.1039/x0xx00000x

www.rsc.org/

Usawadee Sakulkhu<sup>a</sup>, Morteza Mahmoudi<sup>b,c</sup>, Lionel Maurizi<sup>a</sup>, Geraldine Coullerez<sup>a</sup>, Margarethe Hofmann-Amttenbrink<sup>d</sup>, Farhad Rezaee<sup>e</sup>, and Heinrich Hofmann<sup>a\*</sup>

## Electronic supplementary information

### Materials

Gold (III) chloride trihydrate (HAuCl<sub>4</sub>·3H<sub>2</sub>O), tetraethylorthosilicate (TEOS, 99%), tetramethylammonium hydroxide pentahydrate (TMAOH, 25%wt solution), 3-aminopropyltriethoxysilane (APTES), sodium borohydride were purchased from Sigma-Aldrich Chemie GmbH, Buchs, Switzerland. Sodium citrate tribasic dehydrate, absolute ethanol and tetrakis (hydroxymethyl) phosphonium chloride (THPC, 80% in water) were from Fluka Chemie GmbH, Buchs, Switzerland. Titanium (IV) tetraethoxide (TEOT) was purchased from Merck (schweiz) AG, Zug, Switzerland. NH<sub>4</sub>OH (25% aqueous solution) was purchased from BDH, VWR International AG, Dietikon, Switzerland. Phosphate buffer saline (PBS) and fetal bovine serum were purchased from Gibco BRL, Life Technologies, Basel, Switzerland. All chemicals were used as received. In all preparations, ultrapure deionized water (DI water) (Seralpur delta UV/UF setting, 0.055 µS/cm) was used.

Polyvinyl alcohol (PVA) coated SPION. All chemicals were of analytical reagent grade and were used without further purification. PVA (Mowiol® 3-85) with an average molecular weight (MW) of 14000 g/mol and a hydrolysis degree of 85%, and carboxylic acid functionalized polyvinyl alcohol (KL-506) i.e. a PVA with randomly distributed carboxylic acid groups, with an average molecular weight (MW) of 30000 – 50000 g/mol, a hydrolysis degree of 74 – 80% was supplied by were supplied by Kuraray Specialities Europe GmnH, Germany. Vinylalcohol/vinyl amine copolymer (M12), with an average MW of 80,000-140,000 g/mol was supplied by courtesy of ERKOL S.A, Tarragona Spain (now Sekisui Specialty Chemicals Europe).

### POLYVINYL ALCOHOL COATED SPION.

Polymer solutions were prepared by dissolving the polymer powders in DI water followed by rapidly heating the solutions for 15 min (Mowiol® 3-85 and KL-506) to 4 h (M12) at 90°C. The polymer solutions were then filtered through a sterile filter (pore size: 200 nm). In order to obtain highly positively, positively, neutral and negatively charged PVA coated SPION, the different polymer solutions (i.e. 0.2% w/v M12, a mixture of Mowiol®3-85 and M12 at a mass ratio of 45, 10% w/v Mowiol®3-85 and 6% w/v KL-506 solutions) were mixed with 10 mg<sub>Fe</sub>/ml SPION suspension at the v/v ratio of 1. The particle suspensions were stored at least one week and kept at 4°C until further use. The particle suspension was adjusted to pH 7.4 by 1M NaOH at least one day before used.

### TEOS SILICA AND APTES-TEOS SILICA COATED SPION

Silica coated NPs were prepared according to Stöber sol-gel process<sup>1</sup>. Briefly, stock SPION suspension was diluted with DI water to 0.1 mg<sub>Fe</sub>/ml (total volume 10 ml). The obtained NP suspension was diluted in a solution of 200 µl of TEOS in 40 ml ethanol under vigorous magnetic stirring. Then 1.25 ml of aqueous ammonia (25% w/w) was added in one pot and the mixture was allowed to react for 1 h. Afterwards, the obtained NP suspension were centrifuged at 30000 g for 45 min. The obtained particles (SiO<sub>2</sub>(TEOS)-SPION) were washed twice and dispersed in DI water (final concentration appx. 0.1mgFe/ml).

To produce positive charge silica coated SPION, after 1 h of reaction between SPION suspension and TEOS-ethanol solution, the silica particles were functionalized with amines to promote positively charged nanoparticle. 0.1 ml of APTES was

added to the suspension and kept under magnetic stirring overnight. The reaction mixture was further heat under refluxed at 80°C for 30 min to complete the reaction. The obtained particles (SiO<sub>2</sub>(APTES)-SPION) were washed twice and dispersed in DI water (final concentration appx. 0.1mg<sub>Fe</sub>/ml). The suspension pH was adjusted to pH 6 by HCl, in order to protonate the amine groups for better dispersibility. The nanoparticles were stored at 4°C.

### GOLD COATED SPION

SiO<sub>2</sub>(APTES)-SPION were produced as mentioned previously<sup>2</sup>. A gold seed nanoparticles were produced by addition of 0.5 ml of 1 M NaOH to 45 ml of DI water, followed by 1 ml of a tetrakis (hydroxymethyl) phosphonium chloride (THPC) solution (12 µl of 80% THPC/ml of DI water). The mixture was stirred for 5 min before adding 2 ml of a fresh 1% w/w HAuCl<sub>4</sub> (aq) solution. After 15 min, the solution turned dark brown, indicating the formation of small (2-3 nm) gold seed particles. The gold hydroxide solution for shell deposition was prepared 1 day prior to shell deposition. Twenty-five milligrams of potassium carbonate was dissolved in 100 ml of DI water, followed by the addition of 1.5 ml of a 1.0% w/w HAuCl<sub>4</sub> solution. After stirring for 30 min, the solution appears colorless, indicating that hydrolysis of AuCl<sub>4</sub> has occurred. This gold hydroxide solution was then stored for 24 h in the dark and used immediately.

Prior to shell growth, gold seed particles were adsorbed to SiO<sub>2</sub>(APTES)-SPION which were mildly sonicated for 20 min to ensure uniform particle dispersion and then 2.5 ml of this dispersion (0.05 mg<sub>Fe</sub>/ml) was added to a 15 ml centrifuge tube, followed immediately by the addition of 5 ml of undiluted gold seed particles. The pH was readjusted to 3 with a few drops of concentrated HCl, and the dispersion was gently shaken for 2 min. The mixture was stored in the dark at 40°C overnight to maximize the surface coverage of the gold nanoseeds. The resulting nanoparticle product was isolated by centrifugation at 2500g for 1 h. The supernatant was discarded, and the precipitate was redispersed and washed twice with sonication in 2.5 ml of DI water to remove any unattached gold remaining, as indicated by a colorless supernatant above the precipitate. Finally, the gold nanoshell was prepared by reduction of a gold solution with sodium borohydride in the presence of SiO<sub>2</sub>(APTES)-SPION covered with gold seeds (gold seeds deposited NPs). A 4 ml of the as-prepared gold hydroxide reactant solution was added to a 20 ml glass vial and placed under magnetic stirring. After sonicating for 20min, gold seeds deposited NPs was then added to this reactant solution with amounts that depended on the desired gold shell thickness. The pH was adjusted from 6 to 8 by adding 1 to 2 µl of 25% ammonia to inhibit homogeneous Au particles nucleation. 1 ml of 6.6 mM NaBH<sub>4</sub> was added at 1 ml for every 10 ml of gold solution. The dispersion changes from colorless to blue over the course of about 10 min. The nanoshell product was isolated by centrifugation at 2500g for 1 h. After discarding the supernatant, the precipitate of gold nanoshells was redispersed in 4 ml of DI water with sonication.

### SEMI-QUANTITATIVE ANALYSIS OF PROTEINS ASSOCIATED WITH NANOPARTICLES BY NLC-MS/MSM.

NPs were spun down by centrifugation at 20000 g for 10 min and pellet was resuspended in 25 µl of Sequencing Grade Trypsin (12.5 nanogram/microliter in 25 mM ammonium bicarbonate) and digested using a CEM Discover Microwave Digestor for 15 min at 55°C (70W). The digestion was stopped by addition of 200 µl of 50% acetonitrile + 5% formic acid, dried using a Thermo SpeedVac and resuspended in 13 µl of 5% acetonitrile containing 0.1% formic acid. Samples were analyzed by NanoLC-MS/MS on an Ultimate 3000 system (Dionex, Amsterdam, The Netherlands) interfaced on-line with a LTQ-Orbitrap-XL mass spectrometer (ThermoFisher Scientific, San Jose, CA). Re-dissolved peptides were loaded onto a 5 mm × 300 µm i.d. trapping micro column packed with C18 PepMAP100 5 µm particles (Dionex) in 0.1% FA at the flow rate of 20 µL/min. Upon loading and washing, peptides were back-flush eluted onto a 15 cm × 75 µm i.d. nano-column, packed with C18 PepMAP100 3 µm particles (Dionex). The following mobile phase gradient was delivered at the flow rate of 300 nL/min: in 5–50% of solvent B for 93 min; in 50–80% B for 5 min; in 80% B for 10 min, and back to 5% B for 5 min. Solvent A was 100:0 H<sub>2</sub>O/acetonitrile (v/v) with 0.1% formic acid and solvent B was 10:90 H<sub>2</sub>O/acetonitrile (v/v) with 0.1% formic acid. Peptides were infused into the mass spectrometer via dynamic Nanospray probe (ThermoElectron Corp.) with a stainless steel emitter (Proxeon, Odense, DK). Typical spray voltage was 1.6 kV with no sheath and auxiliary gas flow; ion transfer tube temperature was 200 °C. Mass spectrometer was operated in data-dependent mode. The automated gain control (AGC) was set to 5×10<sup>5</sup> charges and 1×10<sup>4</sup> charges for MS/MS at the linear ion trap analyzer. DDA cycle consisted of the survey scan within m/z 300–1300 at the Orbitrap analyzer with target mass resolution of 60,000 (FWHM, full width at half maximum at m/z 400) followed by MS/MS fragmentation of the five most intense precursor ions under the relative collision energy of 35% in the linear trap. Singly charged ions were excluded from MS/MS experiments, and m/z of fragmented precursor ions were dynamically excluded for further 90 s. Ion selection threshold for triggering MS/MS experiments set to 500 counts. An activation parameter q 0.25 and activation time of 30 ms were applied. PEAKS DB (version 5.3) was applied to spectra generated by LTQ-ORBITRAP-XL to screen the protein composition of corona on SPION shells. The false discovery rate was manually adjusted into zero. The normalized SpC amounts of each protein, identified in the LC-MS/MS study of smooth and jagged surfaces, were calculated by applying the following equation:

$$NpSpC_k = \left( \frac{(SpC/M_w)_k}{\sum_{i=1}^n (SpC/M_w)_i} \right) \times 100$$

where  $NpSpCk$  is the normalized percentage of spectral count for protein  $k$ ,  $SpC$  is the spectral count identified, and  $Mw$  is the molecular weight (in kDa) of the protein  $k$ . The MS analysis

including with  $NpSpCk$  of tightly bound protein eluted from each type nanoparticle was represented in the supportive information (Table S1 to S9).

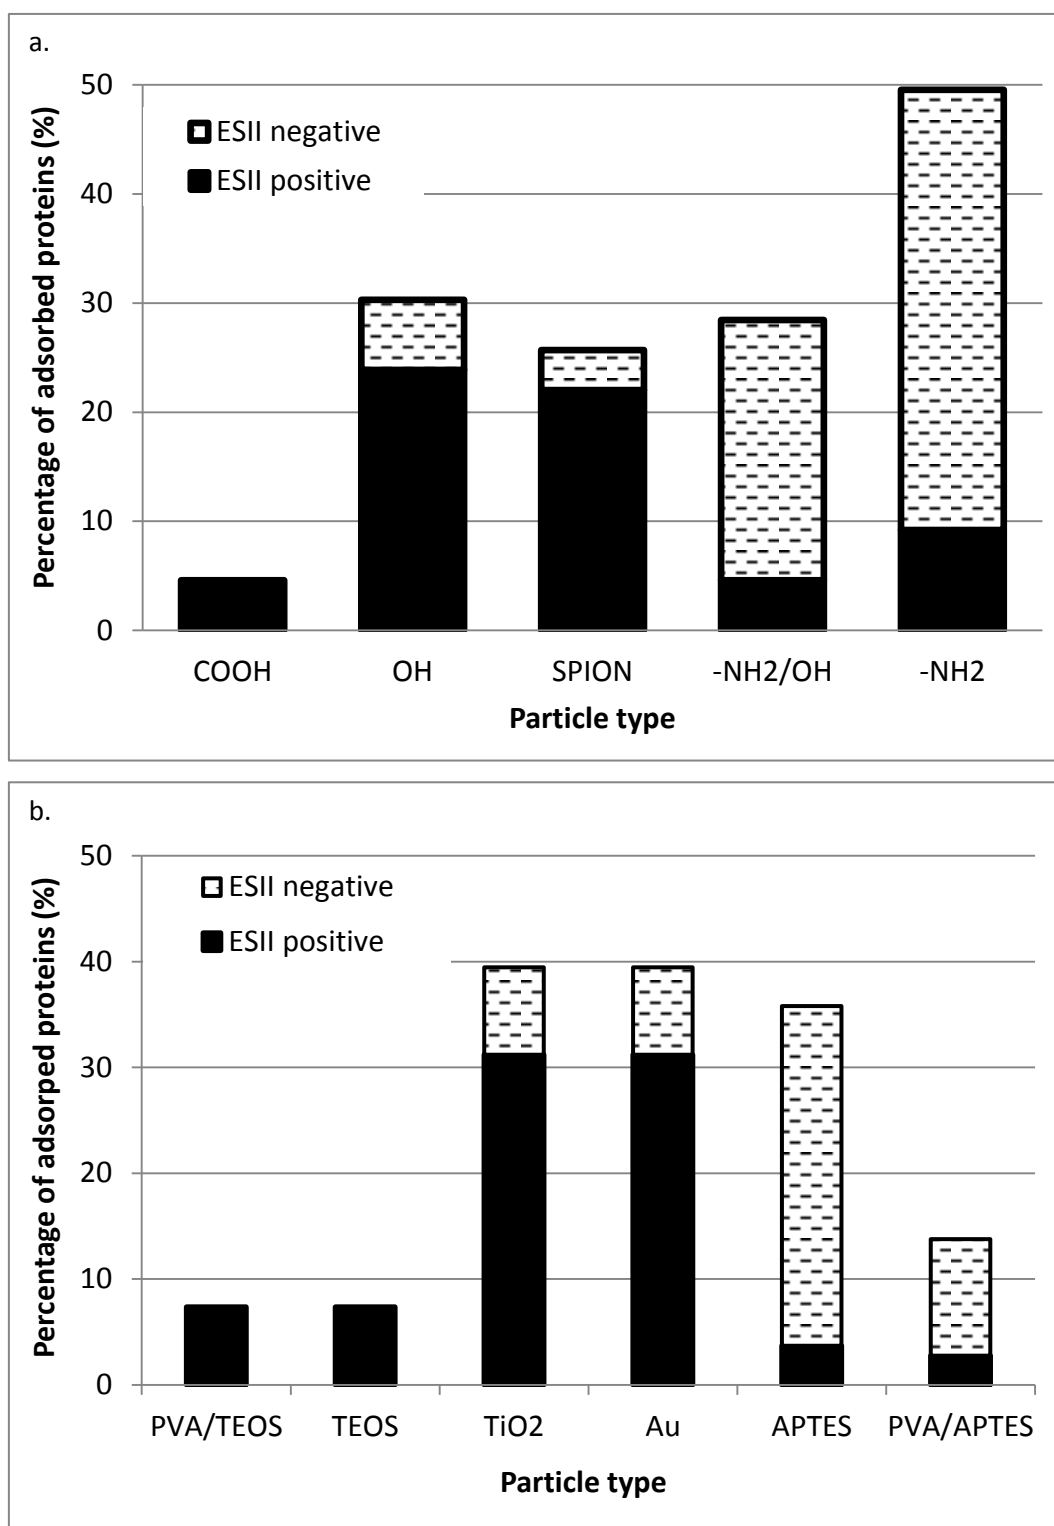

Figure S1. Influence of the particle type and coating on the adsorption of proteins from with a positive ESII (repulsive interaction) and a negative ESII (attraction)

**Table S1:** Protein identification of tightly bound protein eluted from naked SPION (total: 24 identified proteins).

| Accession          | Mw (Da) | Description                                  | NpSpCk |
|--------------------|---------|----------------------------------------------|--------|
| P02070 HBB_BOVIN   | 15954   | Hemoglobin subunit beta                      | 9.63   |
| P34955 A1AT_BOVIN  | 46104   | Alpha-1-antitrypsin                          | 8.33   |
| P02081 HBBF_BOVIN  | 15859   | Hemoglobin fetal subunit beta                | 8.07   |
| P15497 APOA1_BOVIN | 30276   | Apolipoprotein A-I                           | 7.61   |
| P12763 FETUA_BOVIN | 38419   | Alpha-2-HS-glycoprotein                      | 6.00   |
| P81187 CFAB_BOVIN  | 85366   | Complement factor B                          | 4.20   |
| Q03247 APOE_BOVIN  | 35979   | Apolipoprotein E                             | 3.56   |
| P02769 ALBU_BOVIN  | 69294   | Serum albumin                                | 2.22   |
| Q95121 PEDF_BOVIN  | 46229   | Pigment epithelium-derived factor            | 2.21   |
| P00741 FA9_BOVIN   | 46785   | Coagulation factor IX (Fragment)             | 2.19   |
| P28800 A2AP_BOVIN  | 54711   | Alpha-2-antiplasmin                          | 1.87   |
| P01045 KNG2_BOVIN  | 68710   | Kininogen-2                                  | 1.86   |
| P01044 KNG1_BOVIN  | 68890   | Kininogen-1                                  | 1.86   |
| P60712 ACTB_BOVIN  | 41737   | Actin, cytoplasmic 1                         | 1.84   |
| P63258 ACTG_BOVIN  | 41793   | Actin, cytoplasmic 2                         | 1.84   |
| Q2UVX4 CO3_BOVIN   | 187252  | Complement C3                                | 1.64   |
| P56652 ITIH3_BOVIN | 99551   | Inter-alpha-trypsin inhibitor heavy chain H3 | 1.54   |
| P19120 HSP7C_BOVIN | 71241   | Heat shock cognate 71 kDa protein            | 1.44   |
| Q28178 TSP1_BOVIN  | 129534  | Thrombospondin-1                             | 1.38   |
| Q7SIH1 A2MG_BOVIN  | 167575  | Alpha-2-macroglobulin                        | 1.37   |
| Q0VCX2 GRP78_BOVIN | 72400   | 78 kDa glucose-regulated protein             | 1.06   |
| P02672 FIBA_BOVIN  | 67012   | Fibrinogen alpha chain                       | 0.76   |
| P00735 THRB_BOVIN  | 70506   | Prothrombin                                  | 0.73   |
| P01030 CO4_BOVIN   | 3101551 | Complement C4 (Fragments)                    | 0.03   |

**Table S2:** Protein identification of tightly bound protein eluted from highly positively charged PVA coated SPION (PVA<sub>(NH<sub>2</sub>)</sub>-SPION) (total: 55 identified proteins).

| Accession          | Mw (Da) | Description                                  | NpSpCk |
|--------------------|---------|----------------------------------------------|--------|
| P01966 HBA_BOVIN   | 15184   | Hemoglobin subunit alpha                     | 6.69   |
| P02081 HBBF_BOVIN  | 15859   | Hemoglobin fetal subunit beta                | 5.12   |
| P15497 APOA1_BOVIN | 30276   | Apolipoprotein A-I                           | 3.69   |
| P02070 HBB_BOVIN   | 15954   | Hemoglobin subunit beta                      | 3.18   |
| P34955 A1AT_BOVIN  | 46104   | Alpha-1-antitrypsin                          | 3.08   |
| P02769 ALBU_BOVIN  | 69294   | Serum albumin                                | 2.78   |
| P12763 FETUA_BOVIN | 38419   | Alpha-2-HS-glycoprotein                      | 2.64   |
| Q2UVX4 CO3_BOVIN   | 187252  | Complement C3                                | 2.49   |
| P81947 TBA1B_BOVIN | 50152   | Tubulin alpha-1B chain                       | 2.43   |
| Q03247 APOE_BOVIN  | 35979   | Apolipoprotein E                             | 2.26   |
| P81948 TBA4A_BOVIN | 49924   | Tubulin alpha-4A chain                       | 2.24   |
| P02584 PROF1_BOVIN | 15057   | Profilin-1                                   | 2.02   |
| Q76LV2 HS90A_BOVIN | 84731   | Heat shock protein HSP 90-alpha              | 1.92   |
| P60712 ACTB_BOVIN  | 41737   | Actin, cytoplasmic 1                         | 1.70   |
| P63258 ACTG_BOVIN  | 41793   | Actin, cytoplasmic 2                         | 1.70   |
| Q5E9B5 ACTH_BOVIN  | 41877   | Actin, gamma-enteric smooth muscle           | 1.70   |
| P62739 ACTA_BOVIN  | 42009   | Actin, aortic smooth muscle                  | 1.69   |
| Q3ZC07 ACTC_BOVIN  | 42019   | Actin, alpha cardiac muscle 1                | 1.69   |
| P68138 ACTS_BOVIN  | 42051   | Actin, alpha skeletal muscle                 | 1.69   |
| Q0VCG9 PTX3_BOVIN  | 42021   | Pentraxin-related protein PTX3               | 1.45   |
| Q2KJD0 TBB5_BOVIN  | 49671   | Tubulin beta-5 chain                         | 1.43   |
| P52556 BLVRB_BOVIN | 22132   | Flavin reductase (NADPH)                     | 1.38   |
| Q76LV1 HS90B_BOVIN | 83253   | Heat shock protein HSP 90-beta               | 1.34   |
| O46375 TTHY_BOVIN  | 15727   | Transthyretin                                | 1.29   |
| Q7SIH1 A2MG_BOVIN  | 167575  | Alpha-2-macroglobulin                        | 1.27   |
| P17697 CLUS_BOVIN  | 51114   | Clusterin                                    | 1.19   |
| P81187 CFAB_BOVIN  | 85366   | Complement factor B                          | 1.19   |
| Q95121 PEDF_BOVIN  | 46229   | Pigment epithelium-derived factor            | 1.10   |
| P63103 1433Z_BOVIN | 27745   | 14-3-3 protein zeta/delta                    | 1.10   |
| Q3SWY2 ILK_BOVIN   | 51447   | Integrin-linked protein kinase               | 0.99   |
| P61223 RAP1B_BOVIN | 20825   | Ras-related protein Rap-1b                   | 0.98   |
| P02676 FIBB_BOVIN  | 53339   | Fibrinogen beta chain                        | 0.95   |
| P56652 ITIH3_BOVIN | 99551   | Inter-alpha-trypsin inhibitor heavy chain H3 | 0.92   |
| Q5E9B1 LDHB_BOVIN  | 36724   | L-lactate dehydrogenase B chain              | 0.83   |
| P68103 EF1A1_BOVIN | 50141   | Elongation factor 1-alpha 1                  | 0.81   |
| Q05443 LUM_BOVIN   | 38756   | Lumican                                      | 0.79   |
| Q3SZV7 HEMO_BOVIN  | 52209   | Hemopexin                                    | 0.78   |
| Q3MHN5 VTDB_BOVIN  | 53342   | Vitamin D-binding protein                    | 0.76   |
| P19120 HSP7C_BOVIN | 71241   | Heat shock cognate 71 kDa protein            | 0.71   |
| Q3T052 ITIH4_BOVIN | 101513  | Inter-alpha-trypsin inhibitor heavy chain H4 | 0.70   |
| P06868 PLMN_BOVIN  | 91216   | Plasminogen                                  | 0.67   |
| P52193 CALR_BOVIN  | 48039   | Calreticulin                                 | 0.63   |
| Q2KJ83 CBPN_BOVIN  | 52669   | Carboxypeptidase N catalytic chain           | 0.58   |
| Q27965 HS71B_BOVIN | 70229   | Heat shock 70 kDa protein 1B                 | 0.58   |

|                    |        |                                             |      |
|--------------------|--------|---------------------------------------------|------|
| Q27975 HS71A_BOVIN | 70259  | Heat shock 70 kDa protein 1A                | 0.58 |
| Q2KJH9 AL9A1_BOVIN | 53977  | 4-trimethylaminobutyraldehyde dehydrogenase | 0.56 |
| P00978 AMBP_BOVIN  | 39235  | Protein AMBP                                | 0.52 |
| Q3SZ57 FETA_BOVIN  | 68588  | Alpha-fetoprotein                           | 0.44 |
| Q27991 MYH10_BOVIN | 229097 | Myosin-10                                   | 0.44 |
| P31836 NCAM1_BOVIN | 93894  | Neural cell adhesion molecule 1             | 0.43 |
| P00735 THRB_BOVIN  | 70506  | Prothrombin                                 | 0.43 |
| Q28107 FA5_BOVIN   | 248981 | Coagulation factor V                        | 0.41 |
| P12799 FIBG_BOVIN  | 50244  | Fibrinogen gamma-B chain                    | 0.40 |
| P28800 A2AP_BOVIN  | 54711  | Alpha-2-antiplasmin                         | 0.37 |
| P81282 CSPG2_BOVIN | 369991 | Versican core protein                       | 0.19 |

**Table S3:** Protein identification of tightly bound protein eluted from positively charged PVA coated SPION (PVA<sub>(NH<sub>2</sub>/OH)</sub>-SPION) (total: 31 identified proteins).

| Accession          | Mw (Da) | Description                                  | NpSpCk |
|--------------------|---------|----------------------------------------------|--------|
| P15497 APOA1_BOVIN | 30276   | Apolipoprotein A-I                           | 7.16   |
| P01966 HBA_BOVIN   | 15184   | Hemoglobin subunit alpha                     | 6.12   |
| P34955 A1AT_BOVIN  | 46104   | Alpha-1-antitrypsin                          | 6.05   |
| P02081 HBBF_BOVIN  | 15859   | Hemoglobin fetal subunit beta                | 5.86   |
| P12763 FETUA_BOVIN | 38419   | Alpha-2-HS-glycoprotein                      | 4.43   |
| Q03247 APOE_BOVIN  | 35979   | Apolipoprotein E                             | 3.87   |
| P02769 ALBU_BOVIN  | 69294   | Serum albumin                                | 3.80   |
| P02070 HBB_BOVIN   | 15954   | Hemoglobin subunit beta                      | 2.91   |
| P20959 IBP3_BOVIN  | 31570   | Insulin-like growth factor-binding protein 3 | 1.96   |
| P60712 ACTB_BOVIN  | 41737   | Actin, cytoplasmic 1                         | 1.85   |
| P63258 ACTG_BOVIN  | 41793   | Actin, cytoplasmic 2                         | 1.85   |
| P02672 FIBA_BOVIN  | 67012   | Fibrinogen alpha chain                       | 1.85   |
| Q2UVX4 CO3_BOVIN   | 187252  | Complement C3                                | 1.65   |
| P01045 KNG2_BOVIN  | 68710   | Kininogen-2                                  | 1.58   |
| P01044 KNG1_BOVIN  | 68890   | Kininogen-1                                  | 1.57   |
| P02754 LACB_BOVIN  | 19883   | Beta-lactoglobulin                           | 1.56   |
| Q7SIH1 A2MG_BOVIN  | 167575  | Alpha-2-macroglobulin                        | 1.39   |
| Q27967 SPP24_BOVIN | 23134   | Secreted phosphoprotein 24                   | 1.34   |
| P02676 FIBB_BOVIN  | 53339   | Fibrinogen beta chain                        | 1.16   |
| Q95121 PEDF_BOVIN  | 46229   | Pigment epithelium-derived factor            | 1.00   |
| P56652 ITIH3_BOVIN | 99551   | Inter-alpha-trypsin inhibitor heavy chain H3 | 0.93   |
| P81948 TBA4A_BOVIN | 49924   | Tubulin alpha-4A chain                       | 0.93   |
| P17697 CLUS_BOVIN  | 51114   | Clusterin                                    | 0.91   |
| P28800 A2AP_BOVIN  | 54711   | Alpha-2-antiplasmin                          | 0.85   |
| Q32PJ2 APOA4_BOVIN | 43018   | Apolipoprotein A-IV                          | 0.72   |
| Q3T052 ITIH4_BOVIN | 101513  | Inter-alpha-trypsin inhibitor heavy chain H4 | 0.61   |
| P07589 FNC_BOVIN   | 272151  | Fibronectin                                  | 0.57   |
| P00743 FA10_BOVIN  | 54510   | Coagulation factor X                         | 0.57   |
| P00735 THRB_BOVIN  | 70506   | Prothrombin                                  | 0.44   |
| P06868 PLMN_BOVIN  | 91216   | Plasminogen                                  | 0.34   |
| Q27991 MYH10_BOVIN | 229097  | Myosin-10                                    | 0.20   |



**Table S4:** Protein identification of tightly bound protein eluted from neutral PVA<sub>(OH)</sub>-SPION (total: 34 identified proteins).

| Accession          | Mw (Da) | Description                                  | NpSpCk |
|--------------------|---------|----------------------------------------------|--------|
| P01966 HBA_BOVIN   | 15184   | Hemoglobin subunit alpha                     | 9.49   |
| P02081 HBBF_BOVIN  | 15859   | Hemoglobin fetal subunit beta                | 7.27   |
| P15497 APOA1_BOVIN | 30276   | Apolipoprotein A-I                           | 6.19   |
| P34955 A1AT_BOVIN  | 46104   | Alpha-1-antitrypsin                          | 3.75   |
| Q03247 APOE_BOVIN  | 35979   | Apolipoprotein E                             | 3.20   |
| P20959 IBP3_BOVIN  | 31570   | Insulin-like growth factor-binding protein 3 | 3.20   |
| Q27967 SPP24_BOVIN | 23134   | Secreted phosphoprotein 24                   | 3.11   |
| P12763 FETUA_BOVIN | 38419   | Alpha-2-HS-glycoprotein                      | 3.00   |
| P02253 H12_BOVIN   | 10365   | Histone H1.2 (Fragment)                      | 2.78   |
| P02769 ALBU_BOVIN  | 69293   | Serum albumin                                | 2.50   |
| P01045 KNG2_BOVIN  | 68710   | Kininogen-2                                  | 2.31   |
| P01044 KNG1_BOVIN  | 68890   | Kininogen-1                                  | 2.30   |
| P31096 OSTP_BOVIN  | 30904   | Osteopontin                                  | 1.87   |
| P31098 OSTK_BOVIN  | 30969   | Osteopontin-K                                | 1.86   |
| P60712 ACTB_BOVIN  | 41737   | Actin, cytoplasmic 1                         | 1.38   |
| P63258 ACTG_BOVIN  | 41793   | Actin, cytoplasmic 2                         | 1.38   |
| Q5E9B5 ACTH_BOVIN  | 41877   | Actin, gamma-enteric smooth muscle           | 1.38   |
| P62739 ACTA_BOVIN  | 42009   | Actin, aortic smooth muscle                  | 1.37   |
| Q3ZC07 ACTC_BOVIN  | 42019   | Actin, alpha cardiac muscle 1                | 1.37   |
| P68138 ACTS_BOVIN  | 42051   | Actin, alpha skeletal muscle                 | 1.37   |
| Q2KIS7 TETN_BOVIN  | 22144   | Tetranectin                                  | 1.30   |
| A7MAZ5 H13_BOVIN   | 22154   | Histone H1.3                                 | 1.30   |
| Q95121 PEDF_BOVIN  | 46229   | Pigment epithelium-derived factor            | 1.25   |
| Q5E9B1 LDHB_BOVIN  | 36724   | L-lactate dehydrogenase B chain              | 1.18   |
| Q2UVX4 CO3_BOVIN   | 187252  | Complement C3                                | 1.15   |
| P02672 FIBA_BOVIN  | 67012   | Fibrinogen alpha chain                       | 1.08   |
| Q7SIH1 A2MG_BOVIN  | 167575  | Alpha-2-macroglobulin                        | 0.86   |
| P17697 CLUS_BOVIN  | 51114   | Clusterin                                    | 0.85   |
| Q95117 SFRP3_BOVIN | 36234   | Secreted frizzled-related protein 3          | 0.80   |
| Q32PJ2 APOA4_BOVIN | 43018   | Apolipoprotein A-IV                          | 0.67   |
| Q27991 MYH10_BOVIN | 229097  | Myosin-10                                    | 0.44   |
| P81187 CFAB_BOVIN  | 85366   | Complement factor B                          | 0.34   |
| P06868 PLMN_BOVIN  | 91216   | Plasminogen                                  | 0.32   |
| Q28178 TSP1_BOVIN  | 129534  | Thrombospondin-1                             | 0.22   |

**Table S5:** Protein identification of tightly bound protein eluted from negatively charged PVA coated SPION (PVA<sub>(COOH)</sub>-SPION) (total: 5 identified proteins).

| Accession          | Mw (Da) | Description                     | NpSpCk |
|--------------------|---------|---------------------------------|--------|
| P12763 FETUA_BOVIN | 38419   | Alpha-2-HS-glycoprotein         | 7.31   |
| P34955 A1AT_BOVIN  | 46104   | Alpha-1-antitrypsin             | 6.09   |
| P02769 ALBU_BOVIN  | 69294   | Serum albumin                   | 5.07   |
| Q76LV2 HS90A_BOVIN | 84731   | Heat shock protein HSP 90-alpha | 3.31   |
| Q2UVX4 CO3_BOVIN   | 187252  | Complement C3                   | 2.62   |

**Table S6:** Protein identification of tightly bound protein eluted from negatively charged SiO<sub>2</sub> coated SPION (TEOS-SPION) (total: 19 identified proteins).

| Accession          | Mw (Da) | Description                        | NpSpCk |
|--------------------|---------|------------------------------------|--------|
| P15497 APOA1_BOVIN | 30276   | Apolipoprotein A-I                 | 11.18  |
| P01966 HBA_BOVIN   | 15184   | Hemoglobin subunit alpha           | 8.36   |
| P60712 ACTB_BOVIN  | 41737   | Actin, cytoplasmic 1               | 5.07   |
| P63258 ACTG_BOVIN  | 41793   | Actin, cytoplasmic 2               | 4.05   |
| Q5E9B5 ACTH_BOVIN  | 41877   | Actin, gamma-enteric smooth muscle | 4.04   |
| P62739 ACTA_BOVIN  | 42009   | Actin, aortic smooth muscle        | 4.03   |
| Q3ZC07 ACTC_BOVIN  | 42019   | Actin, alpha cardiac muscle 1      | 4.03   |
| P68138 ACTS_BOVIN  | 42051   | Actin, alpha skeletal muscle       | 4.02   |
| Q3SX14 GELS_BOVIN  | 80731   | Gelsolin                           | 2.62   |
| P01045 KNG2_BOVIN  | 68710   | Kininogen-2                        | 2.46   |
| P01044 KNG1_BOVIN  | 68890   | Kininogen-1                        | 2.46   |
| Q03247 APOE_BOVIN  | 35979   | Apolipoprotein E                   | 2.35   |
| P12763 FETUA_BOVIN | 38419   | Alpha-2-HS-glycoprotein            | 2.20   |
| Q2UVX4 CO3_BOVIN   | 187252  | Complement C3                      | 2.03   |
| P81187 CFAB_BOVIN  | 85366   | Complement factor B                | 1.98   |
| P02672 FIBA_BOVIN  | 67012   | Fibrinogen alpha chain             | 1.89   |
| P28800 A2AP_BOVIN  | 54711   | Alpha-2-antiplasmin                | 1.55   |
| P02453 CO1A1_BOVIN | 138939  | Collagen alpha-1(I) chain          | 1.52   |
| Q28178 TSP1_BOVIN  | 129534  | Thrombospondin-1                   | 0.98   |

**Table S7:** Protein identification of tightly bound protein eluted from positively charged SiO<sub>2</sub> coated SPION (APTES-SPION) (total: 40 identified proteins).

| Accession          | Mw (Da) | Description                                  | NpSpCk |
|--------------------|---------|----------------------------------------------|--------|
| P15497 APOA1_BOVIN | 30276   | Apolipoprotein A-I                           | 18.25  |
| P81644 APOA2_BOVIN | 1122    | Apolipoprotein A-II                          | 5.58   |
| P01966 HBA_BOVIN   | 15184   | Hemoglobin subunit alpha                     | 3.43   |
| P02081 HBBF_BOVIN  | 15859   | Hemoglobin fetal subunit beta                | 3.29   |
| P02070 HBB_BOVIN   | 15954   | Hemoglobin subunit beta                      | 3.27   |
| P34955 A1AT_BOVIN  | 46104   | Alpha-1-antitrypsin                          | 3.17   |
| Q03247 APOE_BOVIN  | 35979   | Apolipoprotein E                             | 2.32   |
| Q32PJ2 APOA4_BOVIN | 43018   | Apolipoprotein A-IV                          | 1.94   |
| Q5KR49 TPM1_BOVIN  | 32695   | Tropomyosin alpha-1 chain                    | 1.91   |
| Q5KR47 TPM3_BOVIN  | 32819   | Tropomyosin alpha-3 chain                    | 1.91   |
| Q2UVX4 CO3_BOVIN   | 187252  | Complement C3                                | 1.73   |
| P02769 ALBU_BOVIN  | 69293   | Serum albumin                                | 1.66   |
| Q76LV2 HS90A_BOVIN | 84731   | Heat shock protein HSP 90-alpha              | 1.60   |
| Q95121 PEDF_BOVIN  | 46229   | Pigment epithelium-derived factor            | 1.58   |
| P63103 1433Z_BOVIN | 27745   | 14-3-3 protein zeta/delta                    | 1.50   |
| P68250 1433B_BOVIN | 28081   | 14-3-3 protein beta/alpha                    | 1.49   |
| P05059 CMGA_BOVIN  | 50015   | Chromogranin-A                               | 1.46   |
| P12763 FETUA_BOVIN | 38419   | Alpha-2-HS-glycoprotein                      | 1.36   |
| P60712 ACTB_BOVIN  | 41737   | Actin, cytoplasmic 1                         | 1.25   |
| P63258 ACTG_BOVIN  | 41793   | Actin, cytoplasmic 2                         | 1.25   |
| P81187 CFAB_BOVIN  | 85366   | Complement factor B                          | 1.22   |
| Q27965 HS71B_BOVIN | 70229   | Heat shock 70 kDa protein 1B                 | 1.04   |
| Q27975 HS71A_BOVIN | 70259   | Heat shock 70 kDa protein 1A                 | 1.04   |
| Q76LV1 HS90B_BOVIN | 83253   | Heat shock protein HSP 90-beta               | 1.00   |
| Q5E9B5 ACTH_BOVIN  | 41877   | Actin, gamma-enteric smooth muscle           | 1.00   |
| P62739 ACTA_BOVIN  | 42009   | Actin, aortic smooth muscle                  | 0.99   |
| Q3ZC07 ACTC_BOVIN  | 42019   | Actin, alpha cardiac muscle 1                | 0.99   |
| P68138 ACTS_BOVIN  | 42051   | Actin, alpha skeletal muscle                 | 0.99   |
| Q7SIH1 A2MG_BOVIN  | 167575  | Alpha-2-macroglobulin                        | 0.87   |
| P00743 FA10_BOVIN  | 54510   | Coagulation factor X                         | 0.77   |
| Q28034 GLU2B_BOVIN | 60151   | Glucosidase 2 subunit beta                   | 0.69   |
| Q3SX14 GELS_BOVIN  | 80731   | Gelsolin                                     | 0.65   |
| P02672 FIBA_BOVIN  | 67012   | Fibrinogen alpha chain                       | 0.62   |
| P17697 CLUS_BOVIN  | 51114   | Clusterin                                    | 0.61   |
| P00735 THRB_BOVIN  | 70506   | Prothrombin                                  | 0.44   |
| Q0VCX2 GRP78_BOVIN | 72400   | 78 kDa glucose-regulated protein             | 0.43   |
| Q27991 MYH10_BOVIN | 229097  | Myosin-10                                    | 0.32   |
| P56652 ITIH3_BOVIN | 99551   | Inter-alpha-trypsin inhibitor heavy chain H3 | 0.31   |
| Q3T052 ITIH4_BOVIN | 101513  | Inter-alpha-trypsin inhibitor heavy chain H4 | 0.31   |
| Q28107 FA5_BOVIN   | 248981  | Coagulation factor V                         | 0.29   |

**Table S8:** Protein identification of tightly bound protein eluted from TiO<sub>2</sub> coated SPION (TiO<sub>2</sub>-SPION) (total: 53 identified proteins).

| Accession          | Mw (Da) | Description                                     | NpSpCk |
|--------------------|---------|-------------------------------------------------|--------|
| P01966 HBA_BOVIN   | 15184   | Hemoglobin subunit alpha                        | 8.78   |
| P81644 APOA2_BOVIN | 11202   | Apolipoprotein A-II                             | 7.93   |
| P15497 APOA1_BOVIN | 30276   | Apolipoprotein A-I                              | 7.63   |
| P62326 TYB4_BOVIN  | 5053    | Thymosin beta-4                                 | 7.04   |
| P02081 HBBF_BOVIN  | 15859   | Hemoglobin fetal subunit beta                   | 4.48   |
| P02070 HBB_BOVIN   | 15954   | Hemoglobin subunit beta                         | 4.46   |
| P19035 APOC3_BOVIN | 10692   | Apolipoprotein C-III                            | 4.16   |
| P21752 TYB10_BOVIN | 4805    | Thymosin beta-10                                | 3.70   |
| P02672 FIBA_BOVIN  | 67012   | Fibrinogen alpha chain                          | 3.32   |
| P34955 A1AT_BOVIN  | 46104   | Alpha-1-antitrypsin                             | 2.89   |
| Q3SX14 GELS_BOVIN  | 80730   | Gelsolin                                        | 2.75   |
| P01888 B2MG_BOVIN  | 13677   | Beta-2-microglobulin                            | 2.60   |
| O46375 TTHY_BOVIN  | 15727   | Transthyretin                                   | 2.26   |
| P80425 FABPL_BOVIN | 14227   | Fatty acid-binding protein, liver               | 1.87   |
| P12763 FETUA_BOVIN | 38419   | Alpha-2-HS-glycoprotein                         | 1.85   |
| P19034 APOC2_BOVIN | 11061   | Apolipoprotein C-II                             | 1.61   |
| P81187 CFAB_BOVIN  | 85366   | Complement factor B                             | 1.35   |
| Q03247 APOE_BOVIN  | 35979   | Apolipoprotein E                                | 1.24   |
| P80724 BASP1_BOVIN | 23011   | Brain acid soluble protein 1                    | 1.16   |
| Q3SZK8 NHRF1_BOVIN | 39603   | Na(+)/H(+) exchange regulatory cofactor NHE-RF1 | 1.12   |
| P28800 A2AP_BOVIN  | 54711   | Alpha-2-antiplasmin                             | 0.97   |
| Q95121 PEDF_BOVIN  | 46229   | Pigment epithelium-derived factor               | 0.96   |
| P60712 ACTB_BOVIN  | 41737   | Actin, cytoplasmic 1                            | 0.85   |
| P63258 ACTG_BOVIN  | 41793   | Actin, cytoplasmic 2                            | 0.85   |
| Q32PJ2 APOA4_BOVIN | 43018   | Apolipoprotein A-IV                             | 0.83   |
| Q2KIS7 TETN_BOVIN  | 22144   | Tetranectin                                     | 0.80   |
| Q9TS87 TAGL_BOVIN  | 22599   | Transgelin                                      | 0.79   |
| Q9N212 IPSP_BOVIN  | 45297   | Plasma serine protease inhibitor                | 0.78   |
| P01045 KNG2_BOVIN  | 68710   | Kininogen-2                                     | 0.78   |
| Q6URK6 CADH5_BOVIN | 87467   | Cadherin-5                                      | 0.71   |
| P02769 ALBU_BOVIN  | 69293   | Serum albumin                                   | 0.64   |
| Q5E9B5 ACTH_BOVIN  | 41877   | Actin, gamma-enteric smooth muscle              | 0.64   |
| P62739 ACTA_BOVIN  | 42009   | Actin, aortic smooth muscle                     | 0.63   |
| Q3ZC07 ACTC_BOVIN  | 42019   | Actin, alpha cardiac muscle 1                   | 0.63   |
| P68138 ACTS_BOVIN  | 42051   | Actin, alpha skeletal muscle                    | 0.63   |
| P31096 OSTP_BOVIN  | 30904   | Osteopontin                                     | 0.58   |
| P31098 OSTK_BOVIN  | 30969   | Osteopontin-K                                   | 0.57   |
| P05059 CMGA_BOVIN  | 50015   | Chromogranin-A                                  | 0.53   |
| P13384 IBP2_BOVIN  | 34015   | Insulin-like growth factor-binding protein 2    | 0.52   |
| Q2UVX4 CO3_BOVIN   | 187252  | Complement C3                                   | 0.52   |
| Q0VCX2 GRP78_BOVIN | 72400   | 78 kDa glucose-regulated protein                | 0.49   |
| Q2HJ49 MOES_BOVIN  | 67975   | Moesin                                          | 0.39   |
| P0CB32 HS71L_BOVIN | 70389   | Heat shock 70 kDa protein 1-like                | 0.38   |
| P00735 THRB_BOVIN  | 70506   | Prothrombin                                     | 0.38   |
| P17697 CLUS_BOVIN  | 51114   | Clusterin                                       | 0.35   |

|                    |        |                                              |      |
|--------------------|--------|----------------------------------------------|------|
| P50448 F12AI_BOVIN | 51723  | Factor XIIa inhibitor                        | 0.34 |
| Q28178 TSP1_BOVIN  | 129534 | Thrombospondin-1                             | 0.34 |
| Q28107 FA5_BOVIN   | 248981 | Coagulation factor V                         | 0.32 |
| Q7SIH1 A2MG_BOVIN  | 167575 | Alpha-2-macroglobulin                        | 0.32 |
| Q29RQ1 CO7_BOVIN   | 93090  | Complement component C7                      | 0.29 |
| Q3T052 ITIH4_BOVIN | 101512 | Inter-alpha-trypsin inhibitor heavy chain H4 | 0.26 |
| Q28085 CFAH_BOVIN  | 140374 | Complement factor H                          | 0.25 |
| Q2KJ63 KLKB1_BOVIN | 70994  | Plasma kallikrein                            | 0.25 |

**Table S9:** Protein identification of tightly bound protein eluted from gold coated SPION (Au-SPION) (total: 50 identified proteins).

| Accession          | Mw (Da) | Description                                  | NpSpCk |
|--------------------|---------|----------------------------------------------|--------|
| P01966 HBA_BOVIN   | 15184   | Hemoglobin subunit alpha                     | 7.69   |
| P02081 HBBF_BOVIN  | 15859   | Hemoglobin fetal subunit beta                | 7.36   |
| P15497 APOA1_BOVIN | 30276   | Apolipoprotein A-I                           | 7.19   |
| P02070 HBB_BOVIN   | 15954   | Hemoglobin subunit beta                      | 4.39   |
| P34955 A1AT_BOVIN  | 46104   | Alpha-1-antitrypsin                          | 3.88   |
| Q3SX14 GELS_BOVIN  | 80730   | Gelsolin                                     | 2.99   |
| P19035 APOC3_BOVIN | 10692   | Apolipoprotein C-III                         | 2.91   |
| P02672 FIBA_BOVIN  | 67012   | Fibrinogen alpha chain                       | 2.79   |
| P02769 ALBU_BOVIN  | 69293   | Serum albumin                                | 2.47   |
| Q2UVX4 CO3_BOVIN   | 187252  | Complement C3                                | 2.20   |
| P81644 APOA2_BOVIN | 11202   | Apolipoprotein A-II                          | 2.08   |
| Q03247 APOE_BOVIN  | 35979   | Apolipoprotein E                             | 1.95   |
| Q9N212 IPSP_BOVIN  | 45297   | Plasma serine protease inhibitor             | 1.89   |
| P12763 FETUA_BOVIN | 38419   | Alpha-2-HS-glycoprotein                      | 1.82   |
| Q3T052 ITIH4_BOVIN | 101513  | Inter-alpha-trypsin inhibitor heavy chain H4 | 1.76   |
| Q2KIS7 TETN_BOVIN  | 22144   | Tetranectin                                  | 1.76   |
| P81187 CFAB_BOVIN  | 85366   | Complement factor B                          | 1.73   |
| P01888 B2MG_BOVIN  | 13677   | Beta-2-microglobulin                         | 1.71   |
| P01045 KNG2_BOVIN  | 68710   | Kininogen-2                                  | 1.70   |
| Q95121 PEDF_BOVIN  | 46229   | Pigment epithelium-derived factor            | 1.68   |
| P60712 ACTB_BOVIN  | 41737   | Actin, cytoplasmic 1                         | 1.49   |
| P63258 ACTG_BOVIN  | 41793   | Actin, cytoplasmic 2                         | 1.49   |
| Q3T0A3 CFAD_BOVIN  | 27878   | Complement factor D                          | 1.40   |
| P13384 IBP2_BOVIN  | 34015   | Insulin-like growth factor-binding protein 2 | 1.14   |
| Q3SZ57 FETA_BOVIN  | 68588   | Alpha-fetoprotein                            | 1.13   |
| Q5E9F5 TAGL2_BOVIN | 22426   | Transgelin-2                                 | 1.04   |
| P41361 ANT3_BOVIN  | 52347   | Antithrombin-III                             | 1.04   |
| P06868 PLMN_BOVIN  | 91216   | Plasminogen                                  | 1.02   |
| P50448 F12AI_BOVIN | 51723   | Factor XIIa inhibitor                        | 0.90   |
| P28800 A2AP_BOVIN  | 54711   | Alpha-2-antiplasmin                          | 0.85   |
| P17697 CLUS_BOVIN  | 51114   | Clusterin                                    | 0.76   |
| Q58D62 FETUB_BOVIN | 42663   | Fetuin-B                                     | 0.73   |
| Q28085 CFAH_BOVIN  | 140374  | Complement factor H                          | 0.67   |
| P17690 APOH_BOVIN  | 38252   | Beta-2-glycoprotein 1                        | 0.61   |
| Q29443 TRFE_BOVIN  | 77753   | Serotransferrin                              | 0.60   |
| Q3SZV7 HEMO_BOVIN  | 52209   | Hemopexin                                    | 0.60   |
| Q3MHN5 VTDB_BOVIN  | 53342   | Vitamin D-binding protein                    | 0.58   |
| Q7SIH1 A2MG_BOVIN  | 167575  | Alpha-2-macroglobulin                        | 0.51   |
| Q29RQ1 CO7_BOVIN   | 93090   | Complement component C7                      | 0.50   |
| Q28178 TSP1_BOVIN  | 129534  | Thrombospondin-1                             | 0.48   |
| P56652 ITIH3_BOVIN | 99551   | Inter-alpha-trypsin inhibitor heavy chain H3 | 0.47   |
| P35445 COMP_BOVIN  | 82362   | Cartilage oligomeric matrix protein          | 0.38   |
| Q3SWW8 TSP4_BOVIN  | 105974  | Thrombospondin-4                             | 0.37   |
| P02465 CO1A2_BOVIN | 129064  | Collagen alpha-2(I) chain                    | 0.36   |
| P02453 CO1A1_BOVIN | 138939  | Collagen alpha-1(I) chain                    | 0.34   |

|                    |         |                                              |      |
|--------------------|---------|----------------------------------------------|------|
| Q0VCM5 ITI1_BOVIN  | 101237  | Inter-alpha-trypsin inhibitor heavy chain H1 | 0.31 |
| P00735 THRB_BOVIN  | 70506   | Prothrombin                                  | 0.22 |
| Q2KJ63 KLKB1_BOVIN | 70994   | Plasma kallikrein                            | 0.22 |
| P07589 FNC_BOVIN   | 272151  | Fibronectin                                  | 0.14 |
| P01030 CO4_BOVIN   | 3101551 | Complement C4 (Fragments)                    | 0.02 |

## Notes and references

<sup>a</sup> Laboratory of Powder Technology, Ecole Polytechnique Fédérale de Lausanne, Lausanne, Switzerland

<sup>b</sup> Department of Nanotechnology, Faculty of Pharmacy, Tehran University of Medical Sciences, Tehran, Iran

<sup>c</sup> Nanotechnology Research Center, Faculty of Pharmacy, Tehran University of Medical Sciences, Tehran, Iran.

<sup>d</sup> Mat Search Consulting Hofmann, Ch. Jean Pavillard 14, 1009 Pully, Switzerland

<sup>e</sup> Department for Experimental and Molecular Medicine, Academic Medical Center, University of Amsterdam, Amsterdam, The Netherlands

\*Corresponding author: [heinrich.hofmann@epfl.ch](mailto:heinrich.hofmann@epfl.ch)

## References

1. W. Stober, A. Fink, and E. Bohn, *J. Colloid Interface Sci.*, 1968, **26**, 62–69.
2. M. R. Rasch, K. V. Sokolov, and B. A. Korgel, *Langmuir*, 2009, **25**, 11777–11785.
